# Supplementary material for: Molecular simulation of the diffusion mechanism of nanorods in cross-linked networks
Source: Royal Society of Chemistry journal article supplement (doi:10.1039/d1nr05368j), 2021-01-01
Supplement: d1nr05368j1.pdf [file d1nr05368j1.pdf]

## Electronic Supplementary Information

### **Molecular simulation of diffusion mechanism of nanorods in cross-linked network**

Bo-Ran Zhao<sup>a</sup>, Bin Li<sup>\*a</sup>, Xinghua Shi<sup>\*b,c</sup>

<sup>a</sup> School of Chemical Engineering and Technology, Sun Yat-sen University, Zhuhai, 519082, China.

\*E-mail: [libin76@mail.sysu.edu.cn](mailto:libin76@mail.sysu.edu.cn)

<sup>b</sup> Laboratory of Theoretical and Computational Nanoscience, CAS Center for Excellence in Nanoscience, National Center for Nanoscience and Technology, Chinese Academy of Sciences, Beijing 100190, China.

\*E-mail: [shixh@nanoctr.cn](mailto:shixh@nanoctr.cn)

<sup>c</sup> University of Chinese Academy of Sciences, No. 19A Yuquan Road, Beijing 100049, China

## Contents

|                                                                  |   |
|------------------------------------------------------------------|---|
| Mucus cross-linked network construction .....                    | 2 |
| The method of calculating the major axis vector of nanorod ..... | 2 |
| Description of video files .....                                 | 3 |
| References .....                                                 | 3 |
| Additional tables and figures .....                              | 4 |

## Mucus cross-linked network construction

In a three-dimensional box, 140 polymer chains are distributed randomly, with 100 coarse-grained (CG) beads in each chain, to construct the cross-linked network with high density. The diameter of each CG bead is  $1 \sigma$ , where  $\sigma$  is the length unit of the simulation system. We set every fifth bead as the active bead, a bond is created when the distance between the two active beads on different chains is smaller than  $1.1 \sigma$ . Then the cross-linked network is generated, after the simulation runs for  $1 \times 10^8$  steps with a timestep  $\delta t = 0.005\tau$ , here  $\tau$  is the time unit of the system. For the network with low density, the system includes 66 polymer chains with chain length of 100 CG beads, and set every eighth bead as the active bead, then construct the sparse network by following same procedure as dense network. The pore size distributions of the constructed cross-linked networks with high density and low density is shown in Fig. S1.

## The method of calculating the major axis vector of nanorod

The unit vector parallel with the major axis of nanorod ( $\mathbf{e}_{\parallel}$ ), as well as the unit vectors perpendicular to the major axis of nanorod ( $\mathbf{e}_{\perp 1}$  and  $\mathbf{e}_{\perp 2}$ ), obtained *via* Jacobian transformation for radius of gyration tensors of nanorod,<sup>1,2</sup>

$$\mathbf{A} = \begin{bmatrix} S_{xx} & S_{xy} & S_{xz} \\ S_{yx} & S_{yy} & S_{yz} \\ S_{zx} & S_{zy} & S_{zz} \end{bmatrix} \rightarrow \begin{bmatrix} \lambda_1 \\ \lambda_2 \\ \lambda_3 \end{bmatrix} \begin{bmatrix} S_1 & S_4 & S_7 \\ S_2 & S_5 & S_8 \\ S_3 & S_6 & S_9 \end{bmatrix} \quad (1)$$

with  $S_{ab} = \frac{1}{n} \sum_{i=1}^n (a_i - a_{cm})(b_i - b_{cm})$ , where  $a$  and  $b$  indicate  $x$ ,  $y$  or  $z$  components of the CG bead coordinates,  $a_{cm}$  and  $b_{cm}$  are  $x$ ,  $y$  or  $z$  components of center of mass of nanorods.  $\lambda_1$ ,  $\lambda_2$  and  $\lambda_3$  are the three eigenvalues, and we sort them as  $\lambda_1 > \lambda_2 \approx \lambda_3$ , which represents the cylinder or rod shape. The matrix  $[S_1 \ S_2 \ S_3]^T$  corresponding to the maximum eigenvalue  $\lambda_1$  is the major axis vector  $\mathbf{e}_{\parallel}$  of nanorod, and the other two are  $\mathbf{e}_{\perp 1}$  and  $\mathbf{e}_{\perp 2}$ .

## **Description of video files**

Fig.8\_E-b.mp4: the trajectory movie corresponds to the 3D trajectory (b) in Fig. 8E;

Fig.8\_F-b.mp4: the trajectory movie corresponds to the 3D trajectory (b) in Fig. 8F,;

Fig.8\_G-a.mp4 and Fig.8\_G-b.mp4: the trajectory movies correspond to the 3D trajectories (a) and (b) in Fig. 8G, respectively;

Fig.8\_H-b.mp4: the trajectory movie corresponds to the 3D trajectory (b) in Fig. 8H;

Fig.9\_D-b.mp4: the trajectory movie corresponds to the 3D trajectory (b) in Fig. 9D;

Fig.9\_E-b.mp4: the trajectory movie corresponds to the 3D trajectory (b) in Fig. 9E;

Fig.9\_F-a.mp4 and Fig.9\_F-b.mp4: the trajectory movies correspond to the 3D trajectories (a) and (b) in Fig. 9F, respectively;

## **References**

[1] B. Li, L. Zhao, H. J. Qian and Z. Y. Lu, *Soft Matter*, 2014, 10, 2245-2252.

[2] C.-M. Lin, Y.-Z. Chen, Y.-J. Sheng and H.-K. Tsao, *React. Funct. Polym.*, 2009, 69, 539-545.

## Additional tables and figures

**Table S1. The root mean squared radii of gyration ( $R_g$ ) of the LNRs with different rigidities.**

| $k_{rod} (k_B T / rad^2)$ | 250  | 25   | 2.5  |
|---------------------------|------|------|------|
| $R_g (\sigma)$            | 5.91 | 5.74 | 4.45 |

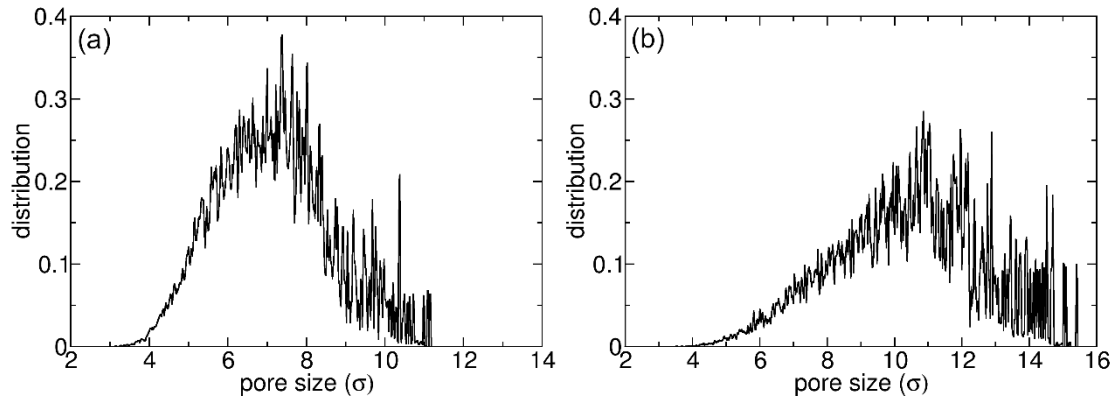

**Fig. S1 The normalized pore size distributions of cross-linked networks with high density (a) and low density (b).**

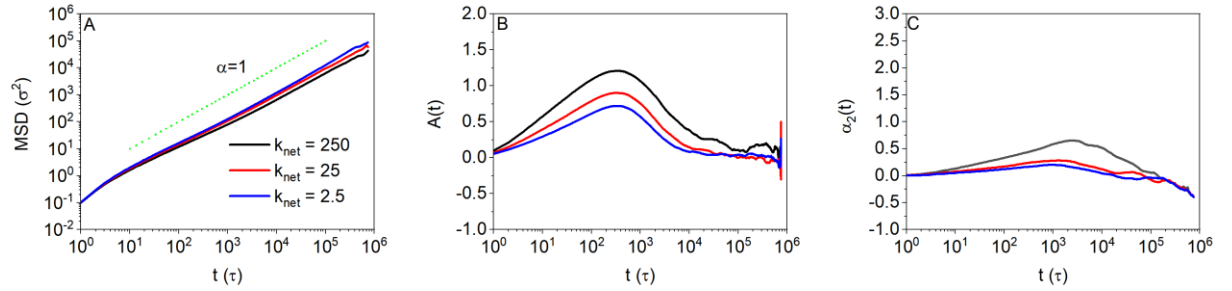

**Fig. S2 MSDs (A),  $A(t)$  values (B) and non-Gaussian parameters (C) of LNRs with  $k_{rod} = 250 k_B T / rad^2$  in low density network, respectively. The legends show different rigidities of network.**

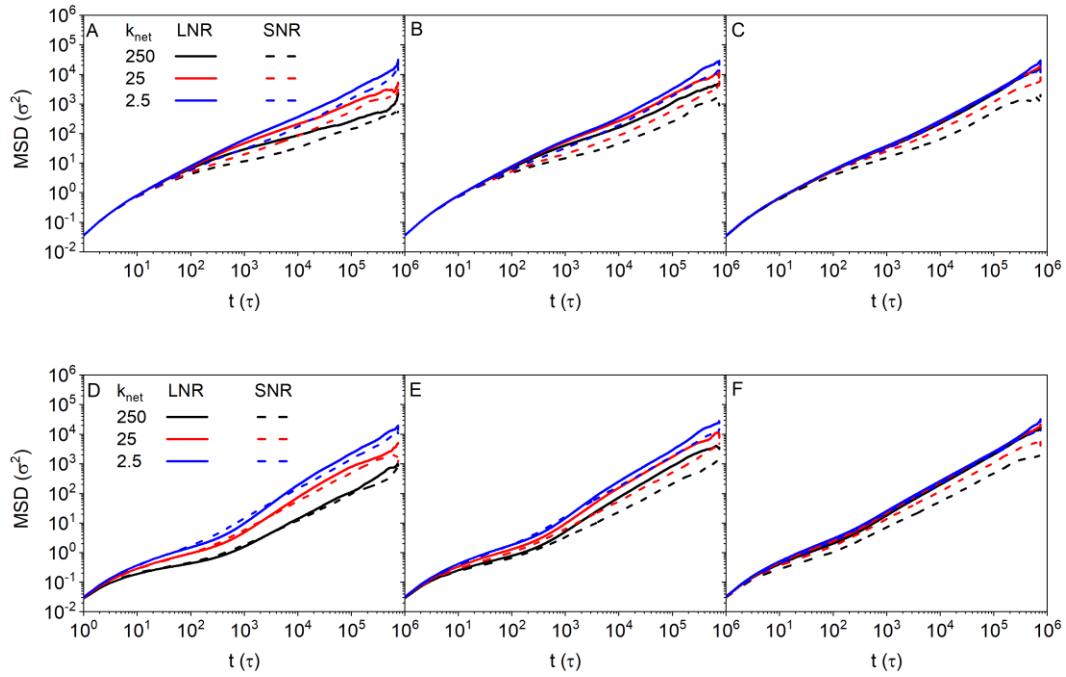

**Fig. S3 (A-C)** The MSDs parallel with axes of nanorods; **(D-F)** the MSDs perpendicular to axes of nanorods. The LNRs are represented by solid curves and SNRs are represented by dashed curves. The  $k_{rod}$  values are 250 (A,D), 25 (B,E) and 2.5 (C,F)  $k_B T / rad^2$ , respectively. The legends show different rigidities of network.

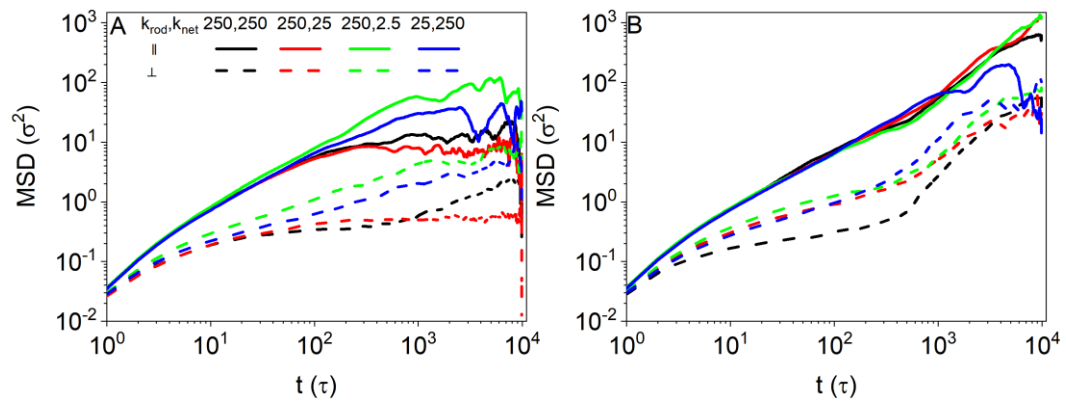

**Fig. S4** The absolute MSDs parallel with and perpendicular to the axes of LNRs within the selected period. **(A)** corresponds to **(a)** trajectories and **(B)** corresponds to **(b)** trajectories in **Fig. 8 E-H**, respectively. The legends show the direction of MSDs and different rigidities of network and LNRs.

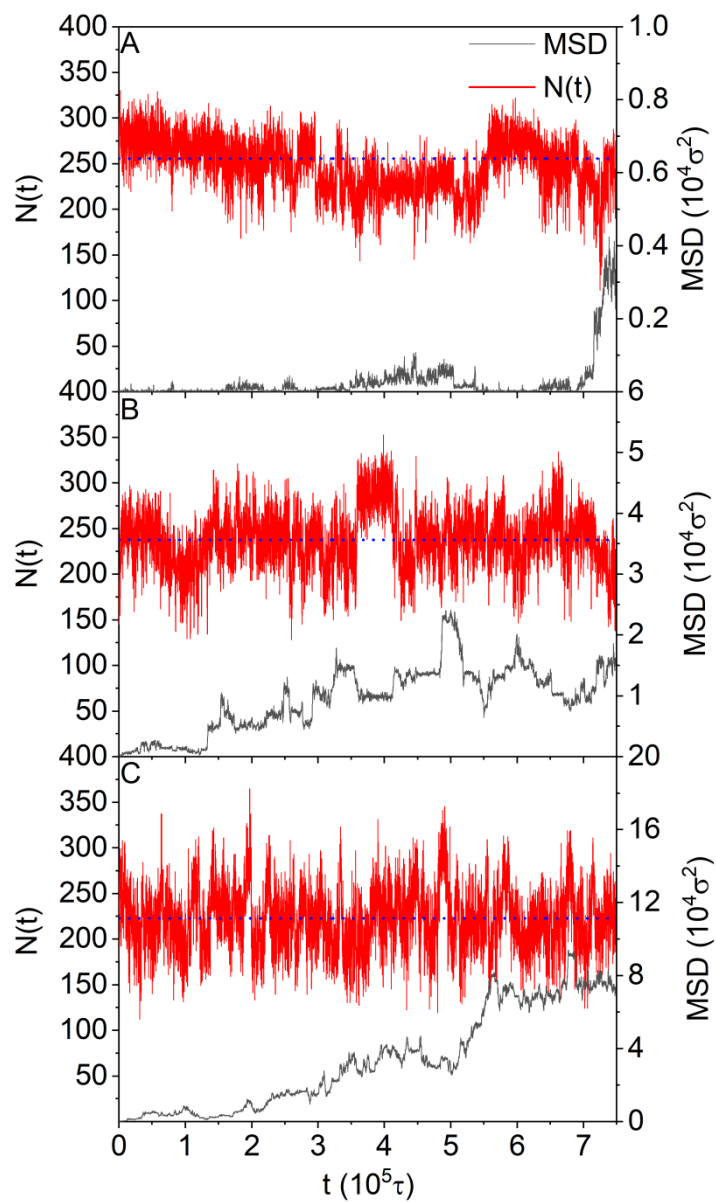

**Fig. S5** The full time evolutions of  $N(t)$  values and MSDs of the selected LNRs. The rigidity of nanorod  $k_{rod}$  is fixed at  $250 k_B T / rad^2$ , and the  $k_{net}$  parameters are 250 (A), 25 (B) and 2.5 (C)  $k_B T / rad^2$ , respectively.

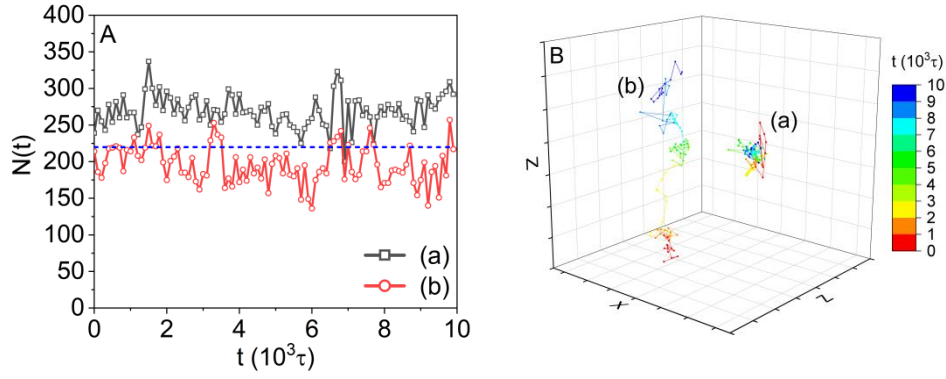

**Fig. S6 (A)** The time evolutions of surrounding dense network beads  $N(t)$  of LNR with  $k_{rod} = 2.5 k_B T / rad^2$ , corresponding to the high  $N(t)$  values (a) and low  $N(t)$  values (b), in the dense cross-linked network with  $k_{net} = 250 k_B T / rad^2$ ; **(B)** the trajectories of center of mass of LNR when the  $N(t)$  values are high (a) and low (b), respectively.

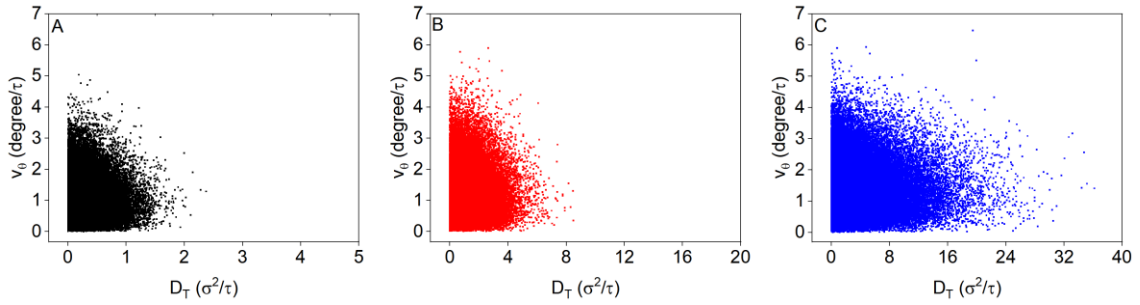

**Fig. S7** The plotted data of instantaneous diffusion coefficients  $D_T$  and angular velocities  $v_\theta$  of the SNRs with  $k_{rod} = 250 k_B T / rad^2$  in dense networks with different rigidities, the  $k_{net}$  parameters are 250 (A), 25 (B) and 2.5 (C)  $k_B T / rad^2$ , respectively.

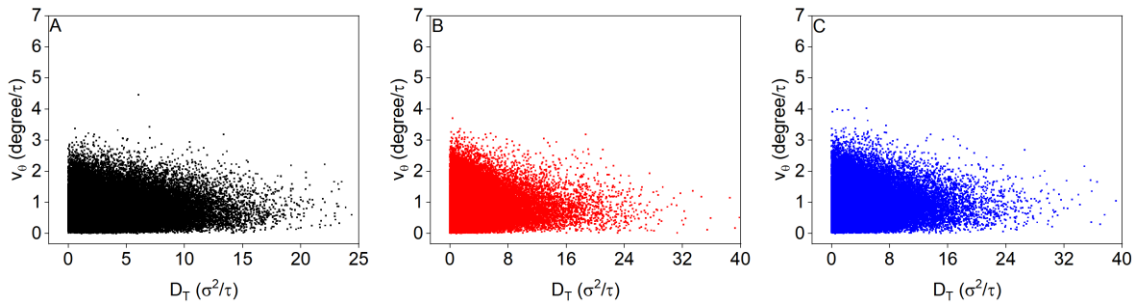

**Fig. S8** The plotted data of instantaneous diffusion coefficients  $D_T$  and angular velocities  $v_\theta$  of the LNRs with  $k_{rod} = 250 k_B T / rad^2$  in sparse networks with different rigidities, the  $k_{net}$  parameters are 250 (A), 25 (B) and 2.5 (C)  $k_B T / rad^2$ , respectively.
